# Supplementary material for: Controllable preparation of CuO/Cu2O composite particles with enhanced photocatalytic performance
Source: Royal Society of Chemistry journal article supplement (doi:10.1039/d0nj00090f), 2020-01-01
Supplement: d0nj00090f1.pdf [file d0nj00090f1.pdf]

**Electronic Supplementary Material (ESI) for New Journal of Chemistry.**  
**This journal is ©The Royal Society of Chemistry and the Centre National de la Recherche Scientifique 2020**

## Supporting Information

Controllable preparation of CuO/Cu<sub>2</sub>O Composite particles with enhanced photocatalytic performance

Qing Jiang, Jiajie Jiang, Runkang Deng, Xinyuan Xie\*, Jianxin Meng

*Department of Chemistry, Jinan University, Guangzhou 510632, China*

\*Corresponding author: txiexy@jnu.edu.cn

Table S1. Synthetic methods and photocatalytic properties of copper-based composites.

| product               | Size      | shape                                             | Synthesis method           | dye     | Light source  | Degradation Amount(g/g) | Time (min) | cocatalyst                                                            | Ref          |
|-----------------------|-----------|---------------------------------------------------|----------------------------|---------|---------------|-------------------------|------------|-----------------------------------------------------------------------|--------------|
| CuO/Cu <sub>2</sub> O | 300-800nm | Nanosheets, octahedrons                           | low-temperature solution   | MO, RhB | visible-light | 0.0273, 0.0013          | 300, 180   | H <sub>2</sub> O <sub>2</sub> , without H <sub>2</sub> O <sub>2</sub> | <sup>1</sup> |
| CuO/Cu <sub>2</sub> O | 1.5-3 μ m | mesoporous, hollow microsphere                    | hydrothermal               | RhB     | UV-light      | ~0.0017                 | 120        | /                                                                     | <sup>2</sup> |
| CuO/Cu <sub>2</sub> O | 3-5 μ m   | mesoporous, hollow microsphere                    | hydrothermal               | MO      | visible-light | 0.0123                  | 300        | /                                                                     | <sup>3</sup> |
| CuO/Cu <sub>2</sub> O | ~2 μ m    | CuO flakes encloses hollow Cu <sub>2</sub> O cube | wet-etching (hydrothermal) | 4-NP    | /             | 0.557                   | 15         | NaBH <sub>4</sub>                                                     | <sup>4</sup> |
| CuO/Cu <sub>2</sub> O | ~1 μ m    | nanosphere of CuO on Cu <sub>2</sub> O surface    | wet chemical               | MO      | visible-light | 0.030                   | 120        | /                                                                     | <sup>5</sup> |
| CuO/Cu <sub>2</sub> O | 100nm     | sphere                                            | thermal decomposition      | RhB     | Visible light | 0.0485                  | 5          | H <sub>2</sub> O <sub>2</sub>                                         | our work     |

\* Corresponding author at: Department of Chemistry, Jinan University, Guangzhou 510632, China. Tel: 020-85220223.

E-mail: txiexy@jnu.edu.cn

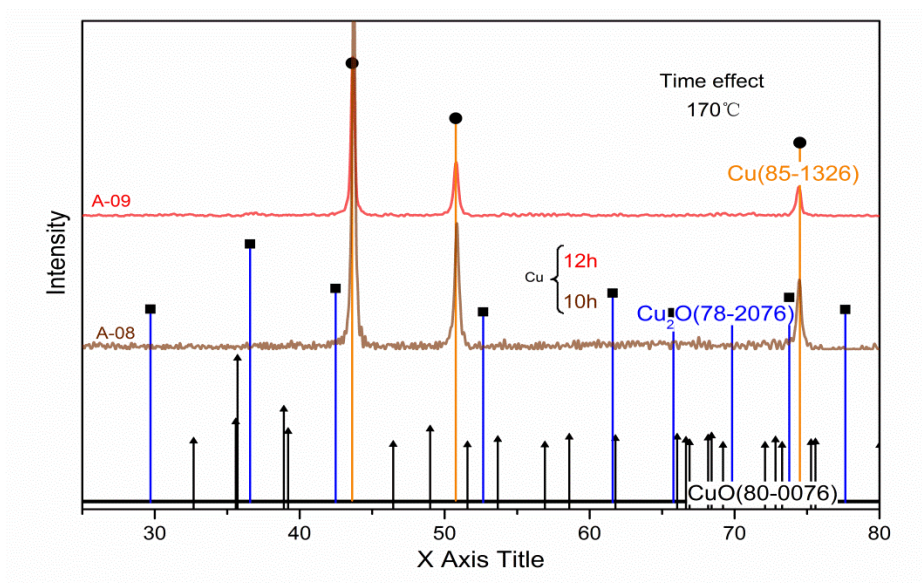

**Fig. S1** The XRD patterns of A-08 and A-09 at 170°C.

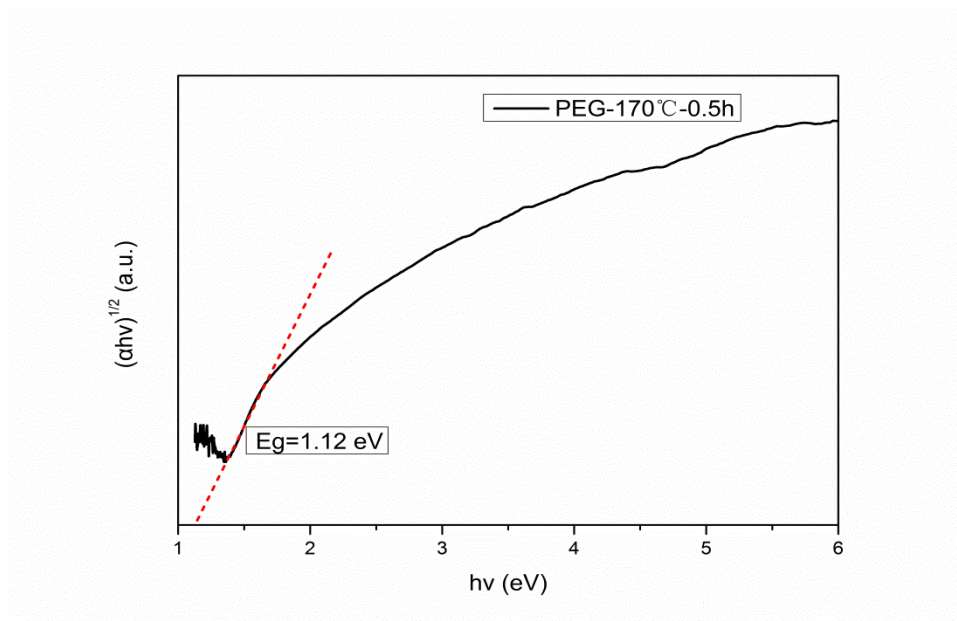

**Fig. S2** The band gap ( $E_g$ ) of A-01(0.5h) at 170°C.

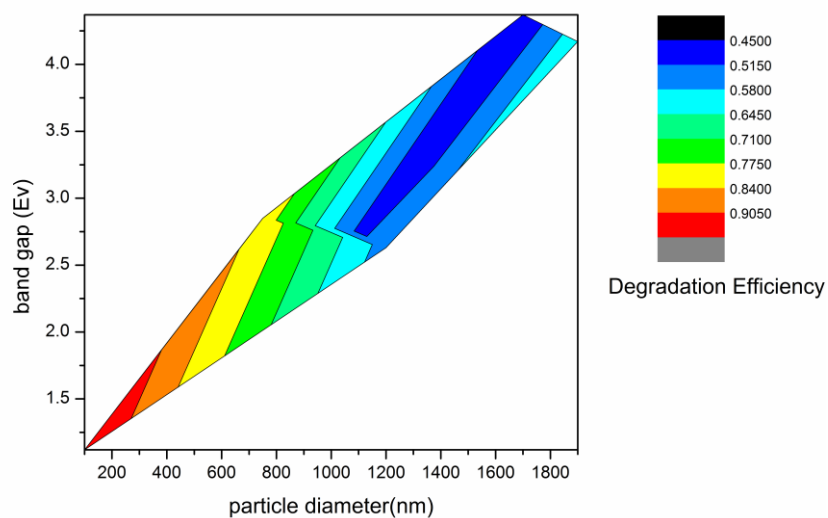

**Fig. S3** The influence of band gap and morphology on the photocatalytic performance.

1. X. Deng, C. Wang, M. Shao, et al. *RSC Adv* 2017, **7**, 4329-4338.
2. S. L. Wang, P. G. Li, H. W. Zhu, et al. *Powder Technol.* **2012**, **230**, 48-53.
3. X. Liu, J. Chen, P. Liu, et al. *Appl. Catal., A* **2016**, **521**, 34-41.
4. D. Choi, D.-J. Jang, *New J. Chem.* 2017, **41**, 2964-2972.
5. D. Jiang, J. Xue, L. Wu, et al. *Appl. Catal., B* 2017, **211**, 199-204.
